# Supplementary material
Source: PubMed Central journal article supplement (PMC8510974)
Supplement: mmc1.pdf [file mmc1.pdf]

**Biophysical Journal, Volume 120**

**Supplemental information**

**Lpp positions peptidoglycan at the AcrA-TolC interface in the AcrAB-TolC multidrug efflux pump**

**James C. Gumbart, Josie L. Ferreira, Hyea Hwang, Anthony J. Hazel, Connor J. Cooper, Jerry M. Parks, Jeremy C. Smith, Helen I. Zgurskaya, and Morgan Beeby**

## Article

# Supplementary Material for Lpp positions peptidoglycan at the AcrA-TolC interface in the AcrAB-TolC multidrug efflux pump

James C. Gumbart<sup>1,\*</sup>, Josie L. Ferreira<sup>2,7</sup>, Hyea Hwang<sup>3,8</sup>, Anthony J. Hazel<sup>1,9</sup>, Connor J. Cooper<sup>4</sup>, Jerry M. Parks<sup>4</sup>, Jeremy C. Smith<sup>4,5</sup>, Helen I. Zgurskaya<sup>6</sup>, and Morgan Beeby<sup>2</sup>

<sup>1</sup>School of Physics, Georgia Institute of Technology, Atlanta GA, 30332, USA

<sup>2</sup>Department of Life Sciences, Imperial College London, London SW7 2AZ, United Kingdom

<sup>3</sup>School of Materials Science and Engineering, Georgia Institute of Technology, Atlanta GA, 30332, USA

<sup>4</sup>UT/ORNL Center for Molecular Biophysics, Biosciences Division, Oak Ridge National Laboratory, 1 Bethel Valley Road, Oak Ridge, TN 37831, USA

<sup>5</sup>Department of Biochemistry & Cellular and Molecular Biology, University of Tennessee, 1311 Cumberland Avenue, Knoxville, TN 37996, USA

<sup>6</sup>Department of Chemistry and Biochemistry, University of Oklahoma, 101 Stephenson Parkway, Norman, OK 73019, USA

<sup>7</sup>Current address: Centre for Structural Systems Biology, Heinrich-Pette-Institut, Leibniz-Institut für Experimentelle Virologie, Hamburg, Germany

<sup>8</sup>Current address: NIH Center for Macromolecular Modeling and Bioinformatics, Beckman Institute, University of Illinois, Urbana, IL 61801, USA

<sup>9</sup>Current address: Computer Aided Drug Design Center, Department of Pharmaceutical Sciences, University of Maryland School of Pharmacy, 20 Penn St. Baltimore, MD 21201, USA

\*Correspondence: [gumbart@physics.gatech.edu](mailto:gumbart@physics.gatech.edu)

Table S1: Lipids used in the IM and OM.

| Lipid | membrane | Lipid (full name)                                                                       |
|-------|----------|-----------------------------------------------------------------------------------------|
| PMPE  | IM       | 1-palmitoyl-2-cis-9,10-methylene-hexadecanoic-acid-sn-glycero-3-phosphoethanolamine     |
| POPE  | IM       | 1-palmitoyl-2-oleoyl-sn-glycero-3-phosphoethanolamine                                   |
| QMPE  | IM       | 1-pentadecanoyl-2-cis-9,10-methylene-hexadecanoic-acid-sn-glycero-3-phosphoethanolamine |
| PMPG  | IM       | 1-palmitoyl-2-cis-9,10-methylene-hexadecanoic-acid-sn-glycero-3-phosphoglycerol         |
| PYPG  | IM       | 1-palmitoyl-2-palmitoleoyl-sn-glycero-3-phosphoglycerol                                 |
| YOPE  | IM       | 1-oleoyl-2-palmitoleoyl-sn-glycero-3-phosphoethanolamine                                |
| PVCL2 | IM/OM    | 1,1'-palmitoyl-2,2'-vacenoyl cardiolipin                                                |
| PPPE  | OM       | 1-palmitoyl(16:0)-2-palmitoleoyl(16:1 cis-9)-phosphoethanolamine                        |
| PVPG  | OM       | 1-palmitoyl(16:0)-2-vacenoyl(18:1 cis-11)-phosphoglycerol                               |

Table S2: Simulations run.

| System         | # atoms   | replicas/windows | time/(replica/window) (ns) | total time (ns) |
|----------------|-----------|------------------|----------------------------|-----------------|
| Full pump      | 1,450,799 | 4                | 300                        | 1200            |
| Full (REUS)    | 1,450,799 | 55               | 25                         | 1375            |
| Lpp x 2 (REUS) | 147,523   | 36               | 30                         | 1080            |

Table S3: Rates of diffusion of lipids in the inner leaflet of the OM. Lpp is for the three acyl chains attached to Lpp's N-terminus. All rates are given in units of  $10^{-8}$  cm<sup>2</sup>/s.

| Lipid | replica 1 | replica 2 | replica 3 | replica 4 |
|-------|-----------|-----------|-----------|-----------|
| PPPE  | 7.5       | 6.8       | 7.0       | 7.2       |
| PVPG  | 7.5       | 7.4       | 6.8       | 7.6       |
| PVCL2 | 5.3       | 4.2       | 4.2       | 4.8       |
| Lpp   | 5.4       | 4.5       | 4.8       | 5.3       |

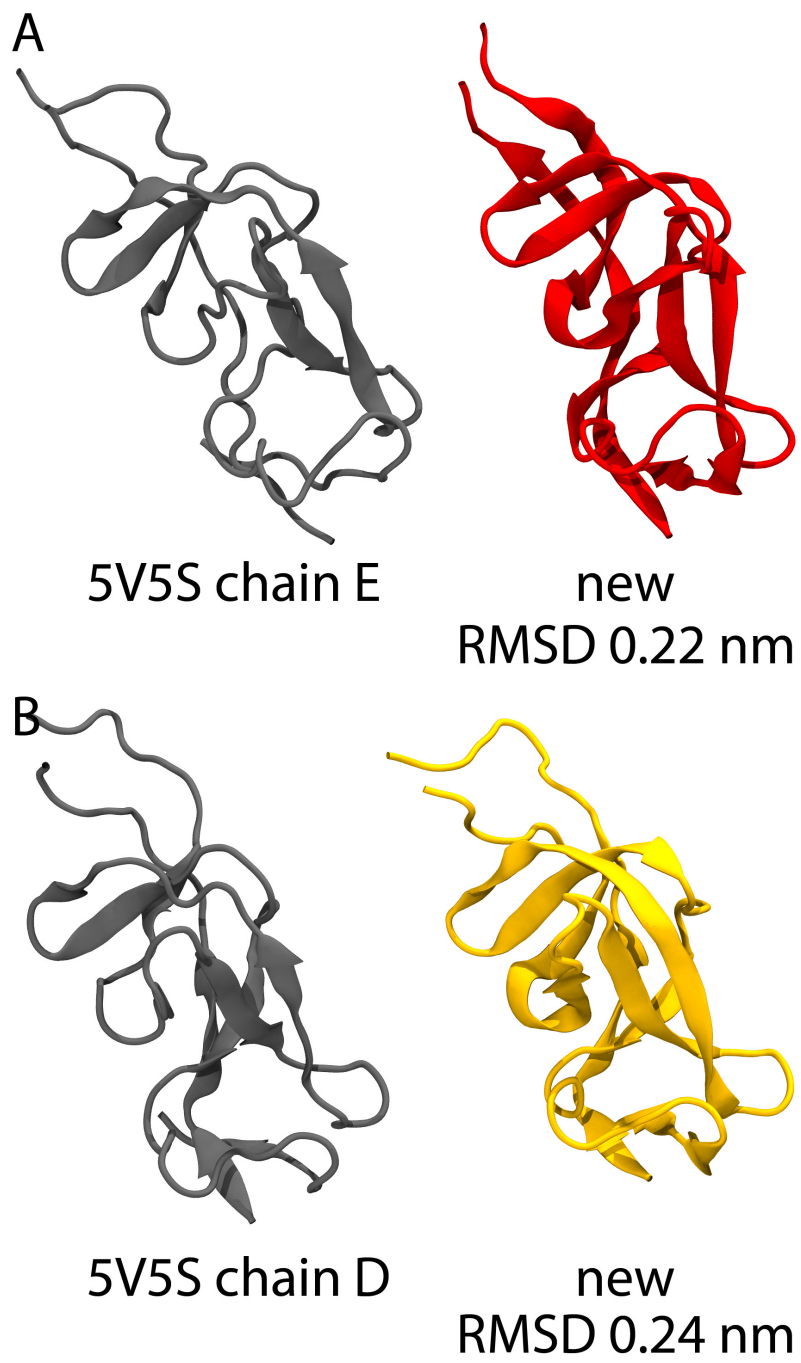

Figure S1: Comparison between AcrA MP domains from PDB 5V5S and the newly modeled ones. (A) AcrA in site 1. (B) AcrA in site 2. The root-mean-square deviation (RMSD) between the model and the original is shown for each.

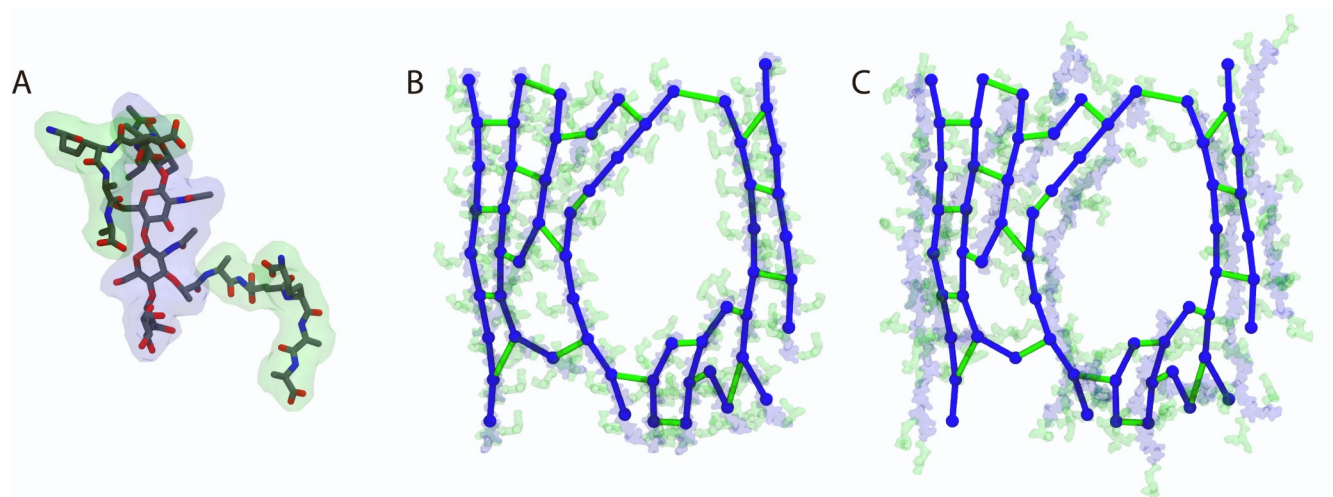

Figure S2: Reverse-coarse-graining of PG. (A) Unit of PG used in in the coarse-grained (CG) models in Nguyen et al. (?), which represents two disaccharides (transparent blue outline) and two peptide stems (transparent green outline). (B) Initial organization of the atomistic PG (transparent) that was reverse-coarse-grained from the CG model extracted from whole-sacculus simulations. (C) Result of equilibration of the atomistic model compared to the same CG starting model.

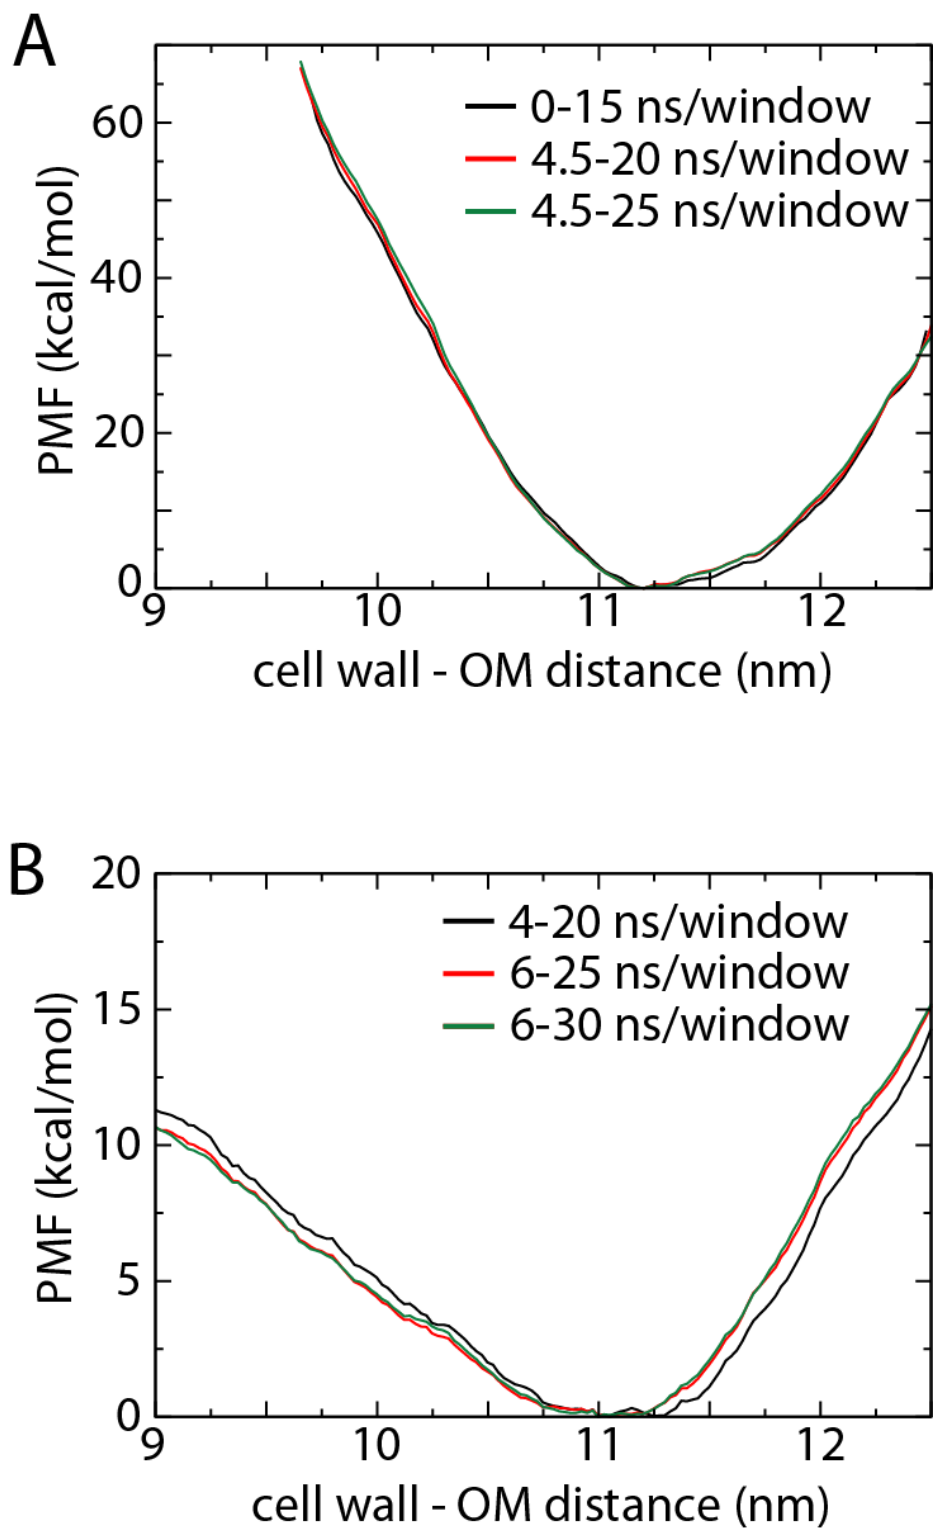

Figure S3: Comparison of the PMFs calculated from different sampling lengths. (A) PMFs for PG-OM distance in the efflux-pump-containing system after 15, 20, and 25 ns/window. Note that for the latter two, the first 4.5 ns is discarded as equilibration. (B) PMFs for the PG-OM distance in the two-Lpp-trimer-only system after 20, 25, and 30 ns/window. For the first one, the first 4 ns is discarded, while for the latter two, the first 6 ns is discarded.

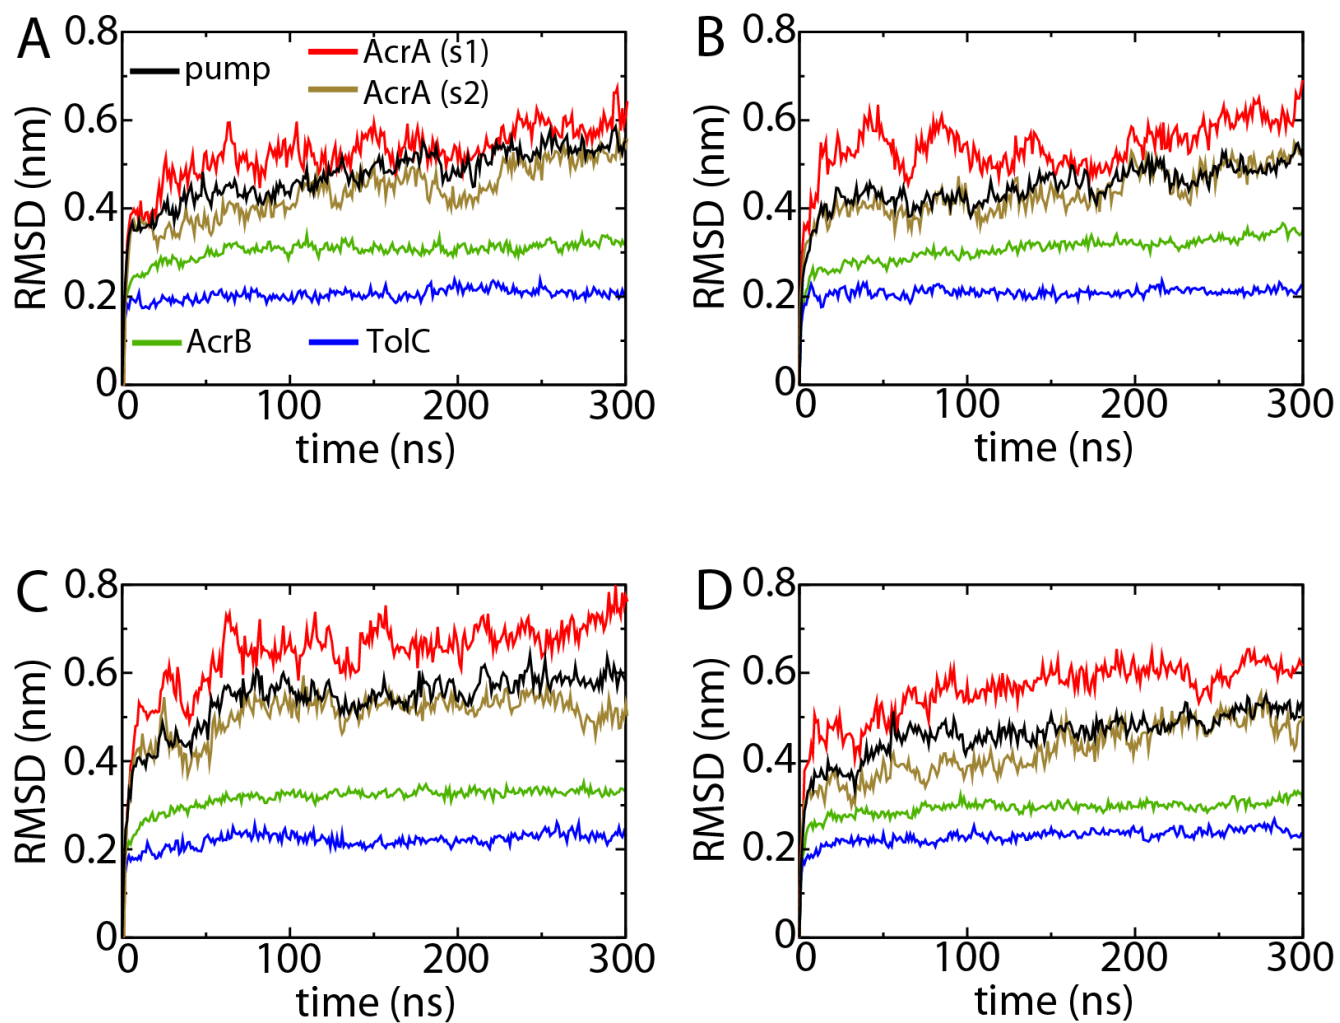

Figure S4: Root mean-square deviation (RMSD) of the pump and its components over four 300-ns replica simulations (A-D). AcrA (s1) and (s2) reference the three copies bound in site 1 and in site 2, respectively.

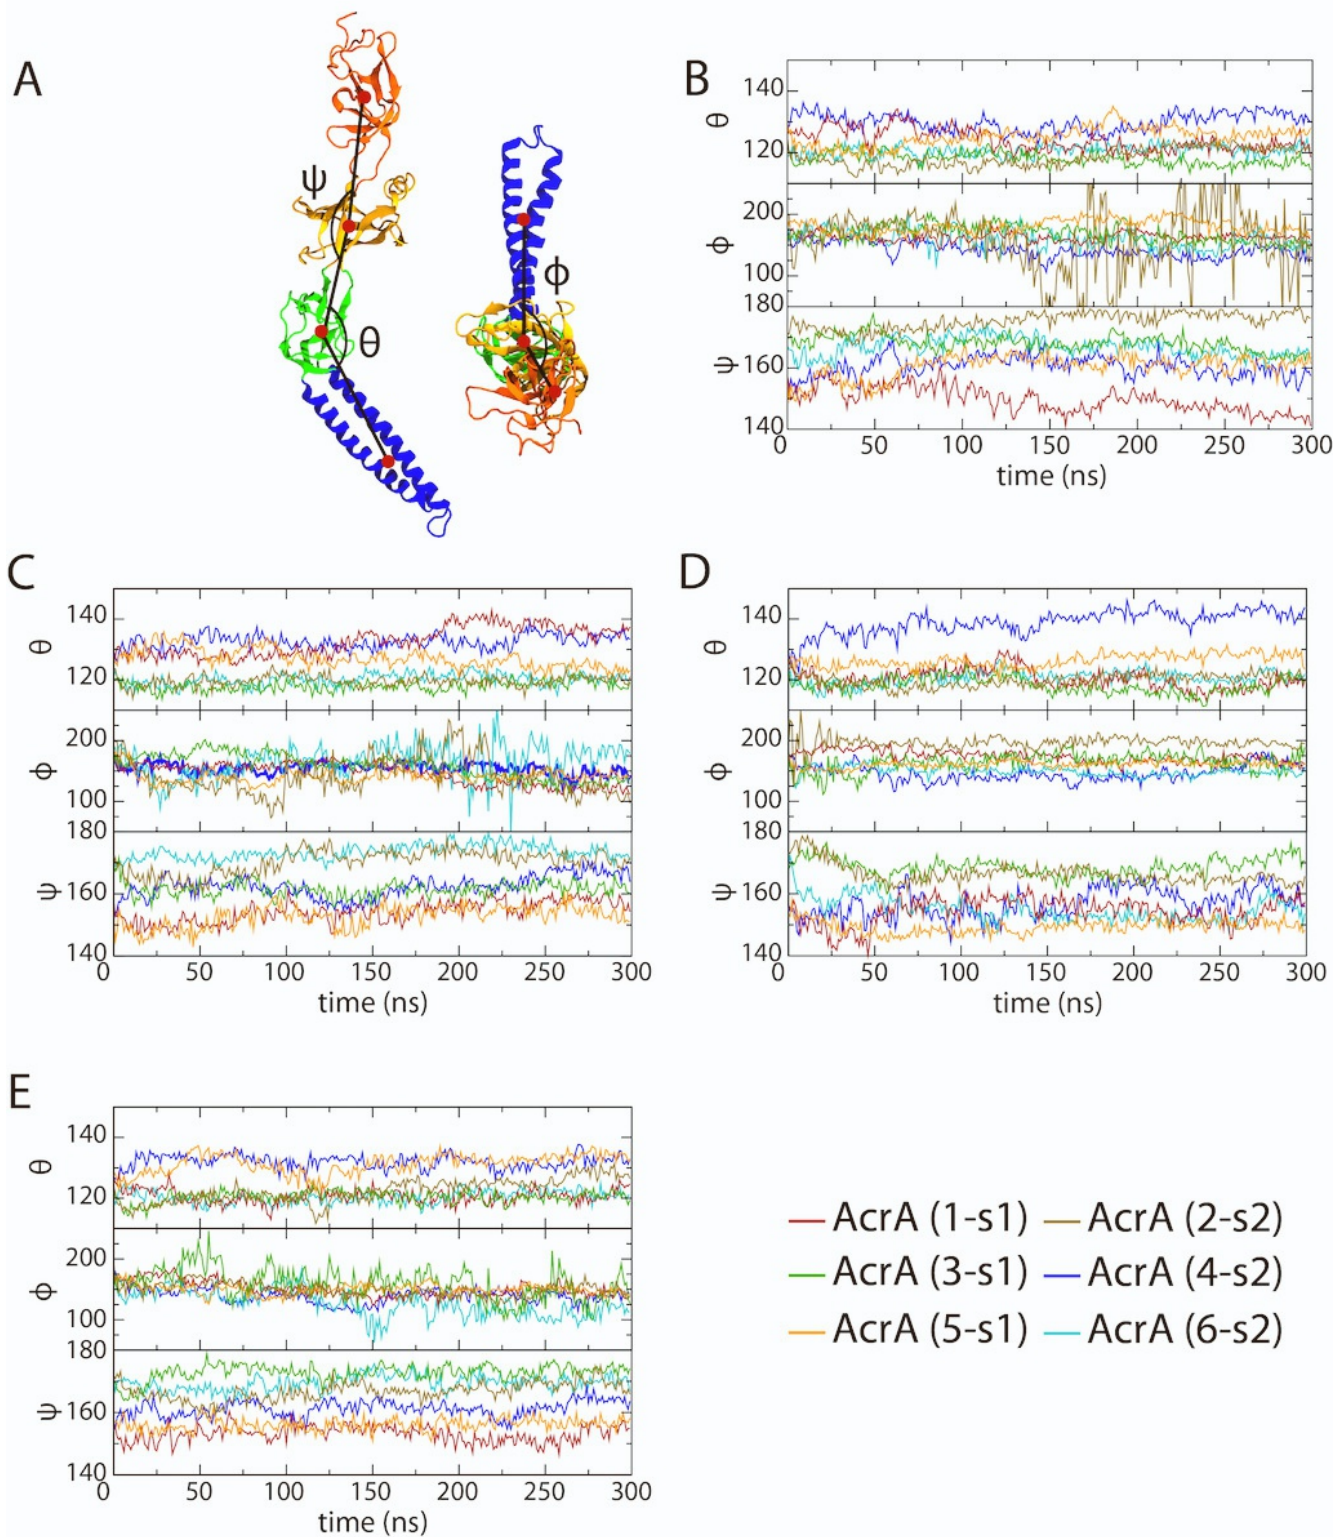

Figure S5: AcrA angles over time. (A) Two angles ( $\theta$  and  $\psi$ ) and one dihedral angle ( $\phi$ ) between AcrA's membrane proximal (orange),  $\beta$ -barrel (yellow), lipoyl (green), and  $\alpha$ -helical (blue) domains used to define AcrA's conformation. (B-E) Three angles over time in the four replica simulations. AcrA copies labeled 1, 3, and 5 are bound to AcrB in site 1, while those labeled 2, 4, and 6 are bound in site 2.



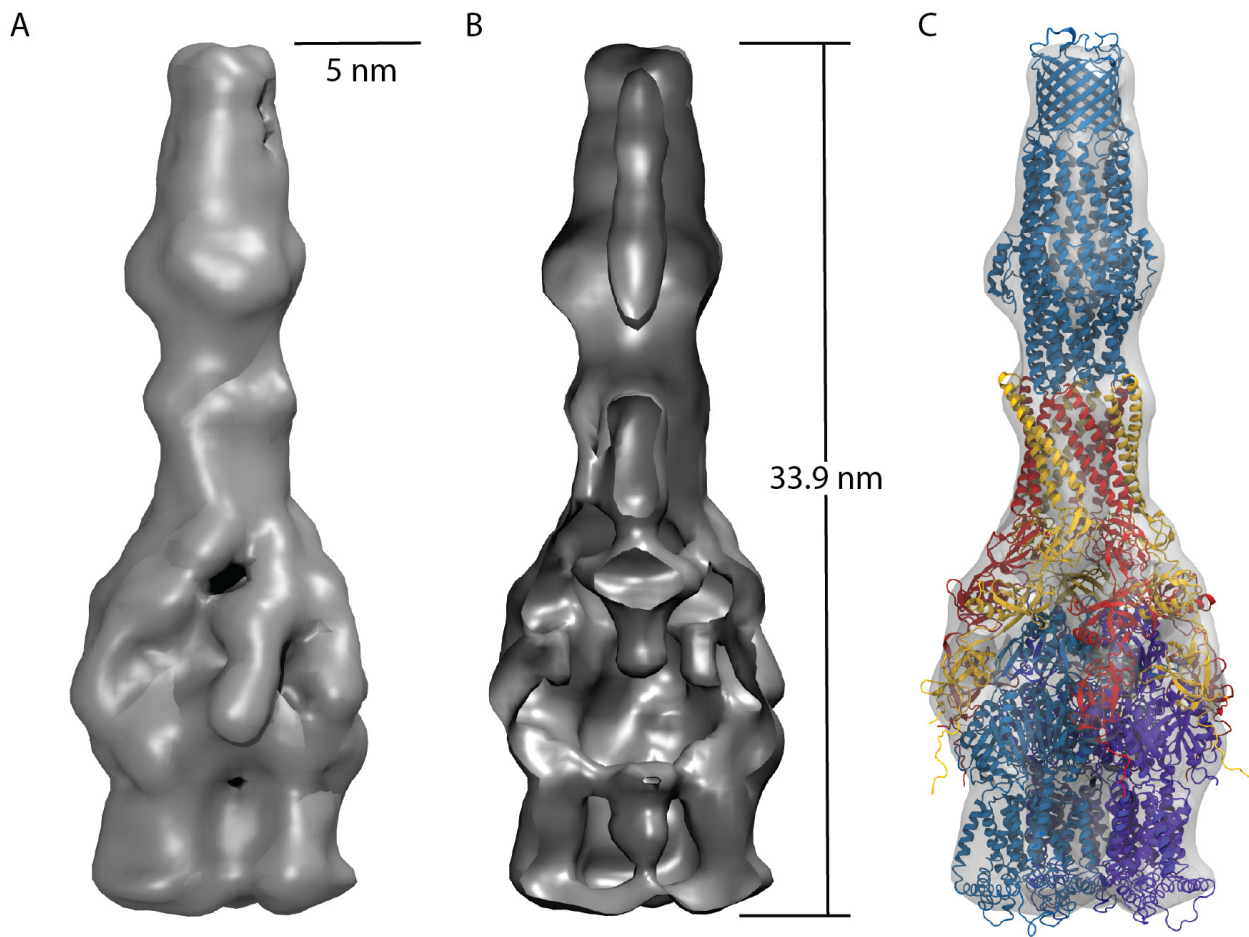

Figure S6: Simulated map. A 15-Å-resolution density map of the efflux pump was created from the the last 200-ns of each of the four equilibration runs. (A) Map. (B) Cut through the center of the map showing the pores and the constriction at the AcrA-TolC junction, as expected. (C) Map outline with atomistic structure, colored as in Fig. 1.

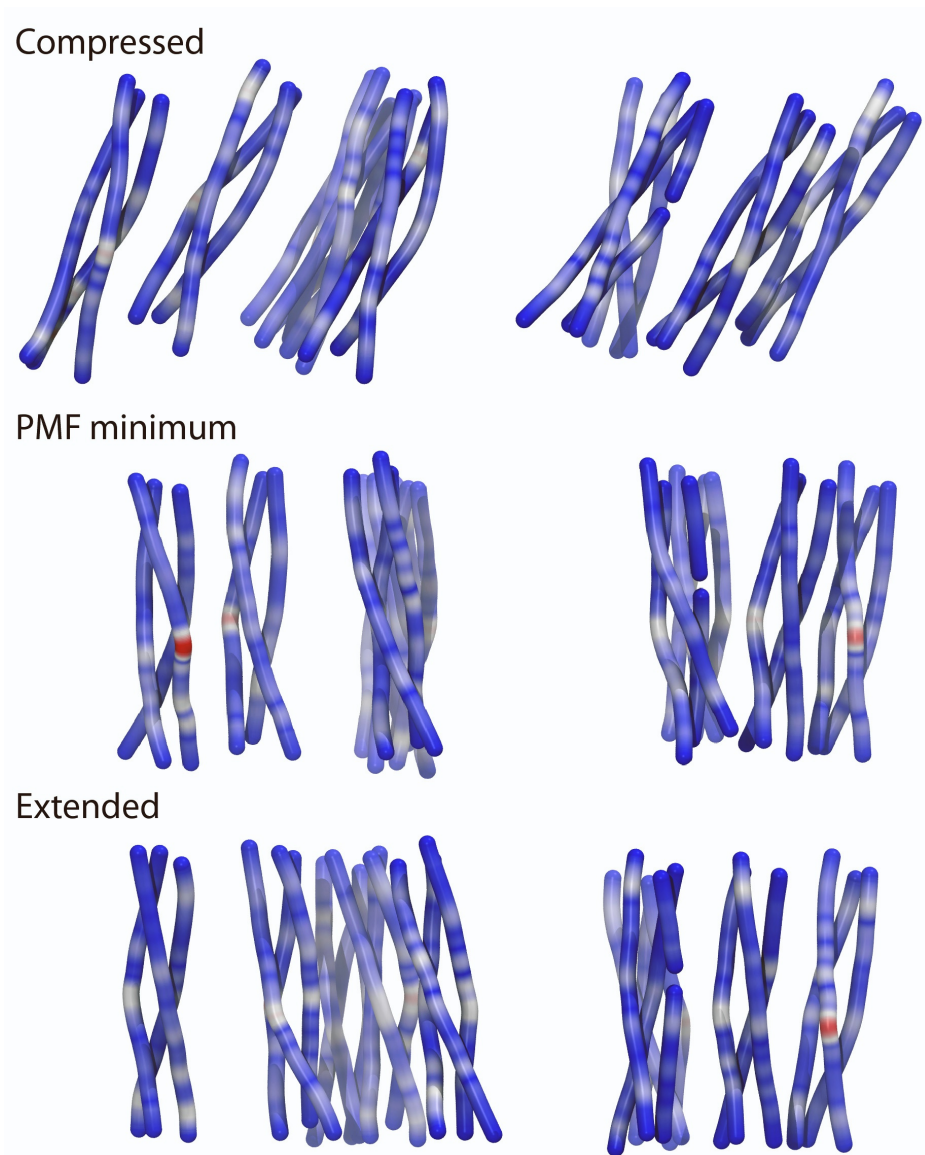

Figure S7: Bend angles of Lpp helices at different OM-PG distances from the end of REUS simulations. The most compressed state represents a distance of 9.7 nm, the PMF minimum is 11.2 nm, and the most extended one is 12.5 nm. The color scale ranges from blue (no kink) to white ( $15^\circ$ ) to red ( $30^\circ$ ). The top is the N-terminus (near the OM) and the bottom is the C-terminus (connected to PG).

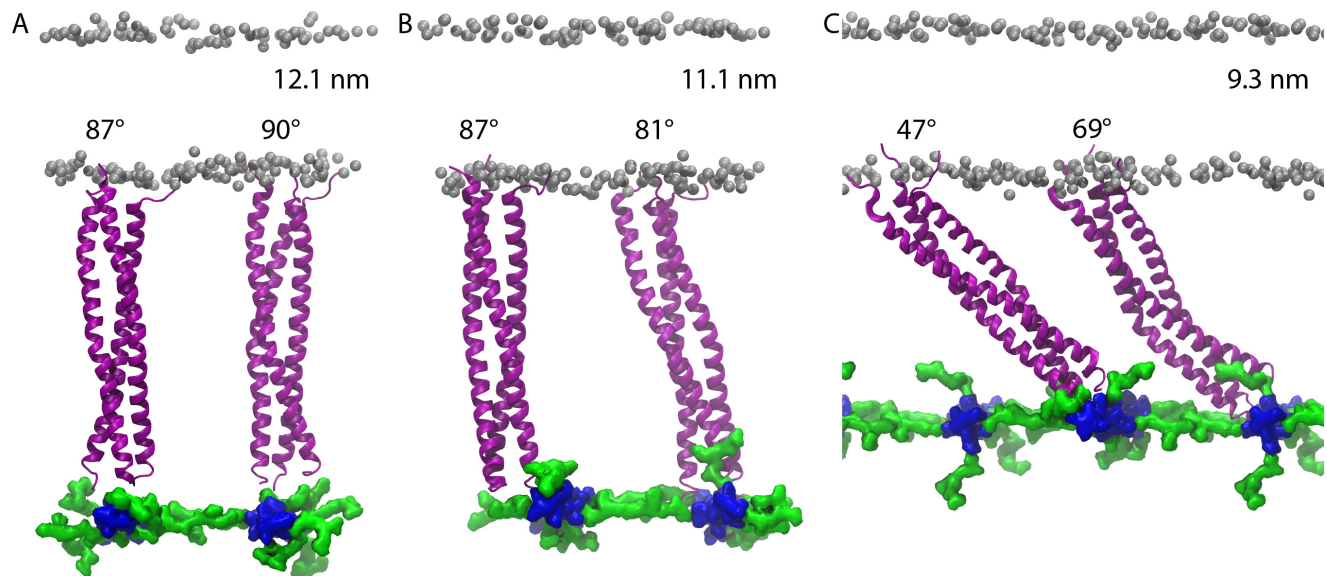

Figure S8: Example states from steered MD simulations of the OM-PG system with two Lpp trimers (purple). Glycan strands of the PG are in blue and peptide chains are in green. Phosphorus atoms of the OM are shown as grey spheres (note that core sugars, which extend above, are not shown). (A) PG-OM distance of 12.1 nm, which is at 10 kcal/mol in the PMF. The Lpp trimers are at  $87^\circ$  and  $90^\circ$ , respectively. (B) PG-OM distance of 11.1 nm, which is near the minimum of the PMF. The Lpp trimers are at  $87^\circ$  and  $81^\circ$ , respectively. (C) PG-OM distance of 9.3 nm, which is at 9 kcal/mol in the PMF. The Lpp trimers are at  $47^\circ$  and  $69^\circ$ , respectively.

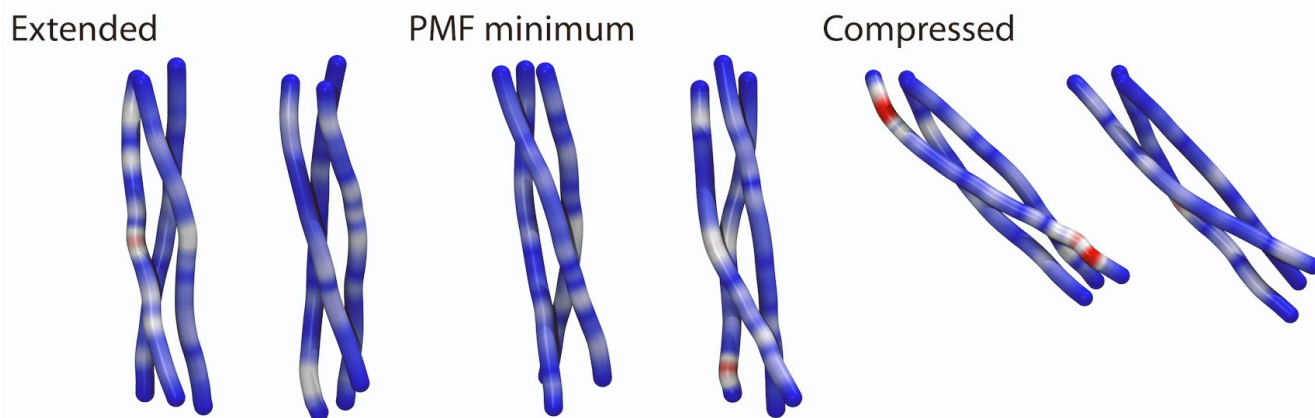

Figure S9: Bend angles of Lpp helices at different OM-PG distances from the end of the Lpp-only REUS simulations. The states are taken from Fig. S8. The color scale ranges from blue (no kink) to white ( $15^\circ$ ) to red ( $30^\circ$ ).

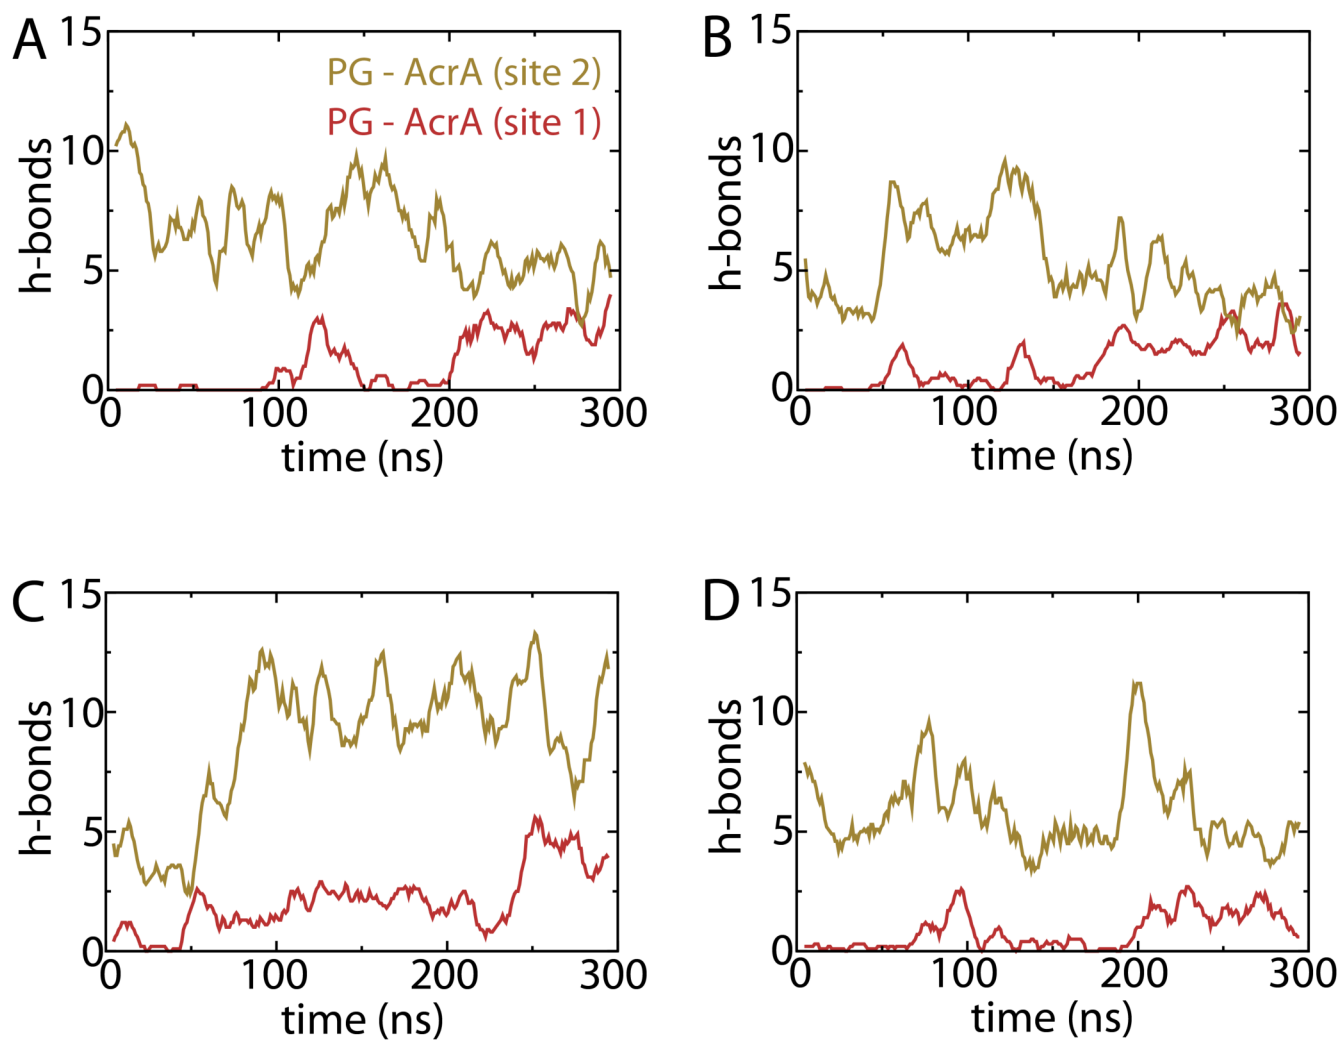

Figure S10: Hydrogen bonds between AcrA and PG over time. The colors represent three copies of AcrA in site 1 (red) and three in site 2 (gold) as in (A) and in Fig. 1 in the main text. The four panels A-D represent the four independent replica simulations.

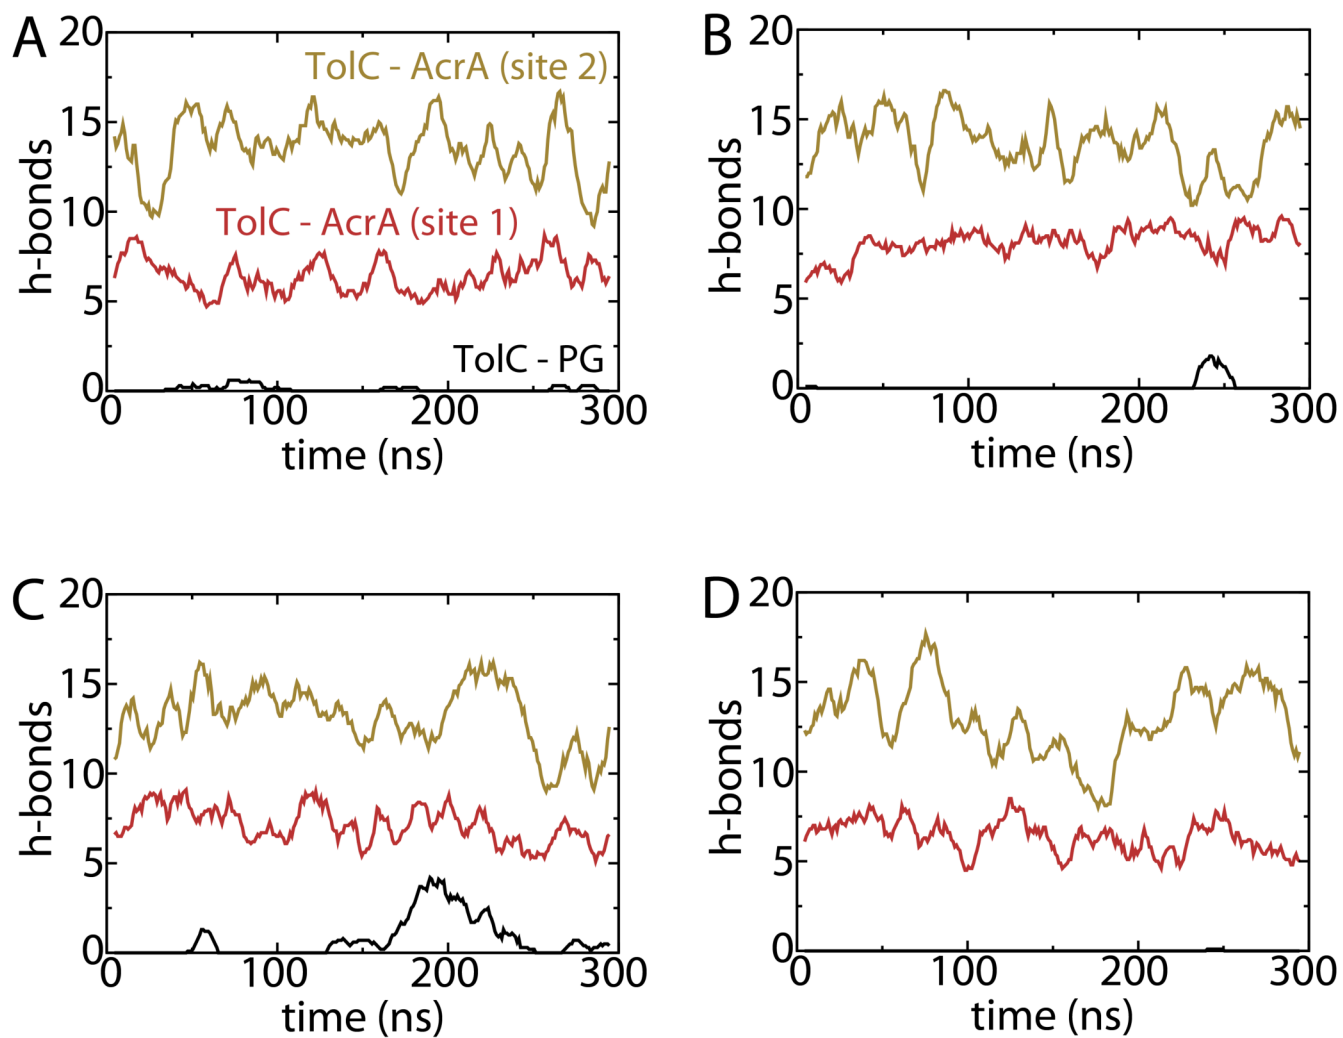

Figure S11: Hydrogen bonds between AcrA and TolC as well as PG and TolC over time. The four panels A-D represent the four independent replica simulations.
